# Supplementary material for: Imported hepatopulmonary echinococcosis: first report of Echinococcus granulosus sensu stricto (G1) in Bolivia
Source: PubMed Central journal article supplement (PMC7083390; doi:10.1590/0037-8682-0046-2018), 2020-01-27
Supplement: 1678-9849-rsbmt-53-e20180046-suppl1.pdf [file 1678-9849-rsbmt-53-e20180046-suppl1.pdf]

**TABLE 1:** Current taxonomy for the genus *Echinococcus* (adapted from references 2 and 3, Laurimäe et al. [Parasitology. 2018;145(14):1929–37], Yanagida et al. [Int J Parasitol. 2017;47(14):971–9], Alvarez Rojas et al. [Int J Parasitol. 2014;44(1):9–18], McManus et al. [Parasitology. 2003;127 Suppl:S37-51] and Nakao et al. [Int J Parasitol. 2013;43(12–13):1017–29]).

| Species                            | Genotype, strain            | Distribution                                                             | Definitive hosts                       | Intermediate hosts                                                                                     | Human infections |
|------------------------------------|-----------------------------|--------------------------------------------------------------------------|----------------------------------------|--------------------------------------------------------------------------------------------------------|------------------|
| <i>E. granulosus</i> senso stricto | G1 - Common sheep strain    | Worldwide                                                                | <b>Dog</b> , fox, dingo, jackal, hyena | <b>Sheep</b> , cattle, pig, camel, goat, macropods                                                     | Commonest        |
| <i>E. granulosus</i> senso stricto | G2 - Tasmanian sheep strain | Tasmania, Argentina                                                      | <b>Dog</b> , fox                       | <b>Sheep</b> , cattle (?)                                                                              | Commonest        |
| <i>E. granulosus</i> senso stricto | G3 - Buffalo strain         | Asia                                                                     | <b>Dog</b> , fox (?)                   | <b>Bovine</b> (water buffalo, cattle?), sheep                                                          | Commonest        |
| <i>Echinococcus equinus</i>        | G4 - Horse strain           | Worldwide                                                                | <b>Dog</b>                             | Equines ( <b>horse</b> , donkey, zebra)                                                                | Unknown          |
| <i>Echinococcus ortleppi</i>       | G5 - cattle strain          | Europe, South Africa, India, Nepal, Sri Lanka, Russia, South America (?) | <b>Dog</b>                             | <b>Bovine</b> (buffalo, cattle), sheep, goat, pig                                                      | Less common      |
| <i>Echinococcus canadensis</i>     | G6 - Camel strain           | Middle East, Iran, Africa, China, Nepal, Argentina                       | <b>Dog</b>                             | <b>Camelids</b> , goat, cattle                                                                         | Common           |
| <i>Echinococcus canadensis</i>     | G7 - Pig strain             | Poland, Slovakia, Ukraine, Russia, Argentina                             | <b>Dog</b>                             | Pig                                                                                                    | Common           |
| <i>Echinococcus canadensis</i>     | G8 - Cervid strain          | Holarctic zone (North America, Northern Eurasia)                         | <b>Wolf</b> , dog                      | American cervids (moose, wapiti, muskox)                                                               | Uncommon         |
| <i>Echinococcus felidis</i>        | G9 - Lion strain            | Africa                                                                   | Lion, spotted hyena                    | Warthog, zebra, wildebeest, bush pig, buffalo, various antelope species, giraffe (?), hippopotamus (?) | Unknown          |
| <i>Echinococcus canadensis</i>     | G10 - Cervid strain         | Holarctic zone (North America, Northern Eurasia)                         | <b>Wolf</b> , dog                      | Fennoscandian cervids (reindeer, wapiti, moose)                                                        | Uncommon         |
| <i>E. multilocularis</i>           | -                           | Holarctic zone (North America, Northern Eurasia)                         | Fox, dog                               | Voles                                                                                                  | Common           |
| <i>E. shiquicus</i>                | -                           | Tibetan plateau                                                          | Tibetan fox                            | Tibetan fox, plateau pika                                                                              | Unknown          |
| <i>E. oligarthra</i>               | -                           | Neotropical (South America)                                              | Wild felids (leopard, puma)            | Agouti                                                                                                 | Uncommon         |
| <i>E. vogeli</i>                   | -                           | Neotropical (South America)                                              | bush dog                               | Paca                                                                                                   | Uncommon         |
